# Supplementary material for: Challenges to Vaccination against SARS-CoV-2 in Patients with Immune-Mediated Diseases
Source: MDPI journal article supplement (doi:10.3390/vaccines9101147), 2021-10-08
Supplement: s1 [file s1]

**Supplementary Table 1: immunosuppressive treatments in patients with autoimmune diseases**

| Ref.                     | N      | PDN              | Mean/<br>Median<br>PDN dose<br>(mg) | HCQ              | MMF          | B-cell<br>depletion | RTX             | MTX              | AZA         | aTNF             | aIL6        | Colchicine | OCZ            | Other         |
|--------------------------|--------|------------------|-------------------------------------|------------------|--------------|---------------------|-----------------|------------------|-------------|------------------|-------------|------------|----------------|---------------|
| Geisen U et al           | 26     | 7 (27)           | 5                                   | 3 (12)           | 0 (0)        | 0 (0)               | 0 (0)           | 0 (0)            | 1 (4)       | 12 (46)          | 3 (12)      | 0 (0)      | 0 (0)          | 5 (19)        |
| Achiron A et al          | 125    | ND               | ND                                  | 0 (0)            | 0 (0)        | 44 (35)             | 0 (0)           | 0 (0)            | 0 (0)       | 0 (0)            | 0 (0)       | 0 (0)      | 44 (35)        | 49 (39)       |
| Buttari F et al.         | 4      | ND               | ND                                  | 0 (0)            | 0 (0)        | 2 (50)              | 0 (0)           | 0 (0)            | 0 (0)       | 0 (0)            | 0 (0)       | 0 (0)      | 2 (50)         | 1 (25)        |
| Bonelli MM et al.        | 5      | 3 (60)           | ND                                  | 0 (0)            | 2 (40)       | 5 (100)             | 5 (100)         | 1 (20)           | 0 (0)       | 0 (0)            | 0 (0)       | 0 (0)      | 0 (0)          | 1 (20)        |
| Simon D et al.           | 84     | 10 (12)          | ND                                  | 3 (4)            | 0 (0)        | 0 (0)               | 0 (0)           | 16 (19)          | 0 (0)       | 11 (13)          | 3 (4)       | 0 (0)      | 0 (0)          | 23 (27)       |
| Allen-Philbey K et al.   | 33     | ND               | ND                                  | 0 (0)            | 0 (0)        | 17 (52)             | 1 (3)           | 0 (0)            | 0 (0)       | 0 (0)            | 0 (0)       | 0 (0)      | 15 (45)        | 11 (33)       |
| Ramirez GA et al.        | 52     | 20 (38)          | 5                                   | 18 (35)          | 5 (10)       | 6 (12)              | 6 (12)          | 15 (29)          | 2 (4)       | 12 (23)          | 4 (8)       | 5 (10)     | 0 (0)          | 10 (19)       |
| Ruddy JA et al.          | 404    | 117 (29)         | ND                                  | 170 (42)         | 41 (10)      | 19 (5)              | 19 (5)          | 94 (23)          | 35 (9)      | 98 (24)          | 7 (2)       | 0 (0)      | 0 (0)          | 168 (42)      |
| Haberman RH et al.       | 82     | ND               | ND                                  | 3 (4)            | 0 (0)        | 1 (1)               | 1 (1)           | 45 (55)          | 0 (0)       | 31 (38)          | ND          | 0 (0)      | 0 (0)          | 16 (20)       |
| Callejas-Rubio JL et al  | 17     | 9 (53)           | 5                                   | 0 (0)            | 0 (0)        | 0 (0)               | 0 (0)           | 1 (6)            | 0 (0)       | 0 (0)            | 3 (18)      | 0 (0)      | 0 (0)          | 0 (0)         |
| Salviani C et al.        | 2      | 1 (50)           | 3.8                                 | 0 (0)            | 0 (0)        | 2 (100)             | 2 (100)         | 0 (0)            | 0 (0)       | 0 (0)            | 0 (0)       | 0 (0)      | 0 (0)          | 0 (0)         |
| Veenstra J et al.        | 6      | 2 (33)           | 5                                   | 1 (17)           | 1 (17)       | 0 (0)               | 0 (0)           | 2 (33)           | 1 (17)      | 1 (17)           | 0 (0)       | 0 (0)      | 0 (0)          | 1 (17)        |
| Furer V et al.           | 686    | 130 (19)         | 6.7                                 | 133 (19)         | 28 (4)       | 87 (13)             | 86 (13)         | 176 (26)         | 0 (0)       | 172 (25)         | 37 (5)      | 0 (0)      | ND             | 114 (17)      |
| Cherian S et al.         | 513    | 97 (19)          | ND                                  | ND               | ND           | ND                  | ND              | ND               | ND          | ND               | ND          | ND         | ND             | ND            |
| Braun-Moscovici Y et al. | 264    | 92 (35)          | ND                                  | 43 (16)          | 26 (10)      | 48 (18)             | ND              | 78 (30)          | 14 (5)      | 63 (24)          | ND          | ND         | ND             | ND            |
| Boeckel L et al.         | 505    | 77 (15)          | ND                                  | ND               | ND           | 35 (7)              | ND              | 169 (33)         | ND          | 93 (18)          | 1 (0)       | ND         | ND             | 115 (23)      |
| Barbhaiya M et al.       | 1101   | ND               | ND                                  | ND               | ND           | ND                  | ND              | ND               | ND          | ND               | ND          | ND         | ND             | ND            |
| Guerrieri S et al.       | 32     | ND               | ND                                  | ND               | ND           | 16 (50)             | ND              | ND               | ND          | ND               | ND          | ND         | 16 (50)        | 16 (50)       |
| Valor-Méndez L et al.    | 10     | 0 (0)            | 0                                   | 0 (0)            | 0 (0)        | 0 (0)               | 0 (0)           | 0 (0)            | 0 (0)       | 0 (0)            | 0 (0)       | 0 (0)      | 0 (0)          | 10 (100)      |
| Simon D et al. (2)       | 8      | ND               | ND                                  | ND               | ND           | 8 (100)             | 8 (100)         | ND               | ND          | ND               | ND          | ND         | 0 (0)          | ND            |
| Mahil SK et al.          | 84     | 0 (0)            | 0                                   | 0 (0)            | 0 (0)        | 0 (0)               | 0 (0)           | 17 (20)          | 0 (0)       | 27 (32)          | 0 (0)       | 0 (0)      | 0 (0)          | 25 (30)       |
| Khan N et al.            | 7,112  | ND               | ND                                  | ND               | ND           | ND                  | ND              | ND               | ND          | ND               | ND          | ND         | ND             | ND            |
| Damiani G et al.         | 4      | 0 (0)            | 0                                   | 0 (0)            | 0 (0)        | 0 (0)               | 0 (0)           | 0 (0)            | 0 (0)       | 0 (0)            | 0 (0)       | 0 (0)      | 0 (0)          | 4 (100)       |
| Wong S et al.            | 26     | 0 (0)            | 0                                   | 0 (0)            | 0 (0)        | 0 (0)               | 0 (0)           | 0 (0)            | 0 (0)       | 8 (31)           | 0 (0)       | 0 (0)      | 0 (0)          | 14 (54)       |
| Total                    | 11,207 | 565/2710<br>(21) | NA                                  | 374/1936<br>(19) | 103/1936 (5) | 290/2481<br>(12)    | 128/1680<br>(8) | 614/2441<br>(25) | 53/1936 (3) | 528/2441<br>(22) | 58/2095 (3) | 5/1672 (0) | 77/1026<br>(8) | 583/2209 (26) |

aIL6: interleukin 6 inhibitors; aTNF: tumor necrosis factor alpha inhibitor; AZA: azathioprine; HCQ: hydroxychloroquine; MMF: mycophenolate; MTX: methotrexate; OCZ: ocrelizumab; PDN: prednisone (or equivalents); RTX: rituximab.

**Supplementary Table 2: selected adverse reactions after the first dose of adenoviral-vectored and mRNA vaccines in patients with autoimmune diseases**

|                                                                   | Boekel et al.   |               | Cherian et al. | Allen-Philbey et al. | Studies with mRNA vaccines (pooled data)^ |
|-------------------------------------------------------------------|-----------------|---------------|----------------|----------------------|-------------------------------------------|
|                                                                   | ChAdOx1-nCoV-19 | mRNA vaccines |                |                      |                                           |
| <b>Patients: N</b>                                                | 231             | 274           | 513            | 33                   | 1788                                      |
| <b>Patients vaccinated with adenoviral vector vaccines: n (%)</b> | 231 (100)       | 274 (100)     | 447 (87)       | 29 (88)              | 0 (0)                                     |
| <b>Allergic AEs</b>                                               | 4 (2)           | 0 (0)         | ND             | ND                   | 0/1023 (0)                                |
| <b>Disease flares</b>                                             | 14 (6)          | 12 (4)        | 4 (1)          | ND                   | 36/1397 (3)                               |
| <b>Local pain</b>                                                 | 89 (39)         | 107 (39)      | 128 (25)       | 23 (70)              | 871/1485 (59)                             |
| <b>Fatigue</b>                                                    | 83 (36)         | 56 (20)       | 92 (18)        | ND                   | 251/1401 (18)                             |
| <b>Arthralgia/Arthritis</b>                                       | 31 (13)         | 18 (7)        | ND             | ND                   | 50/1076 (5)                               |
| <b>Myalgia</b>                                                    | 11 (5)          | 9 (3)         | 49 (10)        | ND                   | 169/1401 (12)                             |
| <b>Headache</b>                                                   | 81 (35)         | 43 (16)       | 71 (14)        | ND                   | 247/1401 (18)                             |
| <b>Fever</b>                                                      | 39 (17)         | 17 (6)        | 94 (18)        | 7 (21)               | 64/1401 (5)                               |
| <b>Chilling</b>                                                   | 52 (23)         | 20 (7)        | 14 (3)         | ND                   | 80/1401 (6)                               |
| <b>Other</b>                                                      | 34 (15)         | 38 (14)       | ND             | ND                   | 104/1401 (7)                              |

^: Connolly CM et al., Geisen U et al., Ramirez GA et al., Callejas-Rubio JL et al, Furer V et al., Boekel L et al., Mahil SK et al., Simon D et al., Braun-Moscovici Y et al., Damiani G et al.. ND: no data.

**Supplementary Table 3: vaccination efficacy in patients treated with B-cell depleting agents**

| Ref.                        | Vaccine(s)                         | N   | Mean /<br>median time<br>from last<br>RTX<br>(months) | Clinical<br>endpoint<br>(COVID-<br>19) | Serological<br>endpoint | Cellular<br>response<br>endpoint | Responders: N (%) |             |            |
|-----------------------------|------------------------------------|-----|-------------------------------------------------------|----------------------------------------|-------------------------|----------------------------------|-------------------|-------------|------------|
|                             |                                    |     |                                                       |                                        |                         |                                  | Clinical          | Humoral     | T-cellular |
| Achiron A et al             | BNT162b2                           | 44  | 4.9                                                   | No                                     | Yes                     | No                               | ND                | 10/44 (23)  | ND         |
| Buttari F et al.            | BNT162b2 and<br>ChAdOx1<br>nCoV-19 | 2   | 2.5                                                   | No                                     | Yes                     | No                               | ND                | 1/2 (50)    | ND         |
| Bonelli MM et al.           | BNT162b2                           | 5   | 5.7                                                   | No                                     | Yes                     | Yes                              | ND                | 2/5 (40)    | 5/5 (100)  |
| Ramirez GA et al.           | BNT162b2                           | 6   | ND                                                    | Yes                                    | No                      | No                               | 6/6 (100)         | ND          | ND         |
| Ruddy JA et al.             | BNT162b2 and<br>m-1372             | 19  | ND                                                    | Yes                                    | Yes                     | No                               | 19/19<br>(100)    | 6/19 (32)   | ND         |
| Salviani C et al.           | BNT162b2                           | 2   | 6                                                     | No                                     | Yes                     | No                               | ND                | 0/2 (0)     | ND         |
| Furer V et al.              | BNT162b2                           | 87  | 12                                                    | Yes                                    | Yes                     | No                               | 87/87<br>(100)    | 36/87 (41)  | ND         |
| Braun-Moscovici<br>Y et al. | BNT162b2                           | 48  | 7.6                                                   | No                                     | Yes                     | No                               | ND                | 24/48 (50)  | ND         |
| Guerrieri S et al.          | BNT162b2 and<br>m-1372             | 16  | 5                                                     | No                                     | Yes                     | No                               | ND                | 6/16 (38)   | ND         |
| Simon D et al. (2)          | BNT162b2                           | 8   | 3.1                                                   | No                                     | Yes                     | Yes                              | ND                | 0/8 (0)     | 6/8 (75)   |
|                             |                                    |     |                                                       |                                        |                         |                                  |                   |             |            |
| Total                       | NA                                 | 237 | NA                                                    | 3/10 (30)                              | 9/10 (90)               | 2/10(20)                         | 112/112<br>(100)  | 85/231 (37) | 11/13 (85) |

**Supplementary Table 4: incidence of positive skin tests to vaccine excipient in patients with allergy history and incident allergy to anti-SARS-CoV-2 vaccines**

| Ref.                          | Vaccine(s)                        | Skin tests                              |    | General vaccinee population | Self-reported history of allergy | Confirmed history of allergy | Deemed at risk and tested | Additional tests | Additional patients with possible allergy to the first dose |
|-------------------------------|-----------------------------------|-----------------------------------------|----|-----------------------------|----------------------------------|------------------------------|---------------------------|------------------|-------------------------------------------------------------|
|                               |                                   |                                         |    | ND                          | ND                               | 131                          | 131                       | 0                | 0                                                           |
| Rojas-Pérez-Ezquerro P et al. | BNT162b2 and m-1372               | N of positive skin tests to the vaccine | 0  | NA                          | NA                               | 0,0%                         | 0,0%                      | NA               | NA                                                          |
|                               |                                   | N of positive skin tests to PEG         | 2  | NA                          | NA                               | 1,5%                         | 1,5%                      | NA               | NA                                                          |
|                               |                                   | N of positive skin tests to PS80        | 0  | NA                          | NA                               | 0,0%                         | 0,0%                      | NA               | NA                                                          |
|                               |                                   | N of positive skin tests to trometamol  | 0  | NA                          | NA                               | 0,0%                         | 0,0%                      | NA               | NA                                                          |
|                               |                                   |                                         |    | 4042                        | 414                              | 76                           | 18                        | 7                | 7                                                           |
| Paoletti G et al.             | BNT162b2                          | N of positive skin tests to the vaccine | ND | NA                          | NA                               | NA                           | NA                        | ND               | NA                                                          |
|                               |                                   | N of positive skin tests to PEG         | 1  | 0,02%                       | 0,24%                            | 1,32%                        | 5,56%                     | 1                | 14,29%                                                      |
|                               |                                   | N of positive skin tests to PS80        | 1  | 0,02%                       | 0,24%                            | 1,32%                        | 5,56%                     | 1                | 14,29%                                                      |
|                               |                                   | N of positive skin tests to trometamol  | ND | NA                          | NA                               | NA                           | NA                        | ND               | NA                                                          |
|                               |                                   |                                         |    | ND                          | ND                               | 472                          | 16                        | 0                | 0                                                           |
| Banerji A et al.              | m1372, Ad26.COVS.2.S and BNT162b2 | N of positive skin tests to the vaccine | ND | NA                          | NA                               | NA                           | NA                        | NA               | NA                                                          |
|                               |                                   | N of positive skin tests to PEG         | 1  | NA                          | NA                               | 0,21%                        | 6,25%                     | NA               | NA                                                          |
|                               |                                   | N of positive skin tests to PS80        | ND | NA                          | NA                               | NA                           | NA                        | NA               | NA                                                          |
|                               |                                   | N of positive skin tests to trometamol  | ND | NA                          | NA                               | NA                           | NA                        | NA               | NA                                                          |
